# Supplementary material for: Slow sand filtration of raw wastewater using biochar as an alternative filtration media
Source: PubMed Central journal article supplement (PMC6985130; doi:10.1038/s41598-020-57981-0), 2020-01-27
Supplement: 41598_2020_57981_MOESM1_ESM.pdf [file 41598_2020_57981_MOESM1_ESM.pdf]

Supporting materials for

## Slow sand filtration of raw wastewater using biochar as an alternative filtration media

*Korbinian Kaetzl\*, Manfred Lübken, Edith Nettmann, Stefan Krimmler and Marc Wichern*

Institute of Urban Water Management and Environmental Engineering, Fakultät für Bau- und Umweltingenieurwissenschaften, Ruhr-Universität Bochum, Universitätsstr. 150, 44780 Bochum, Germany.

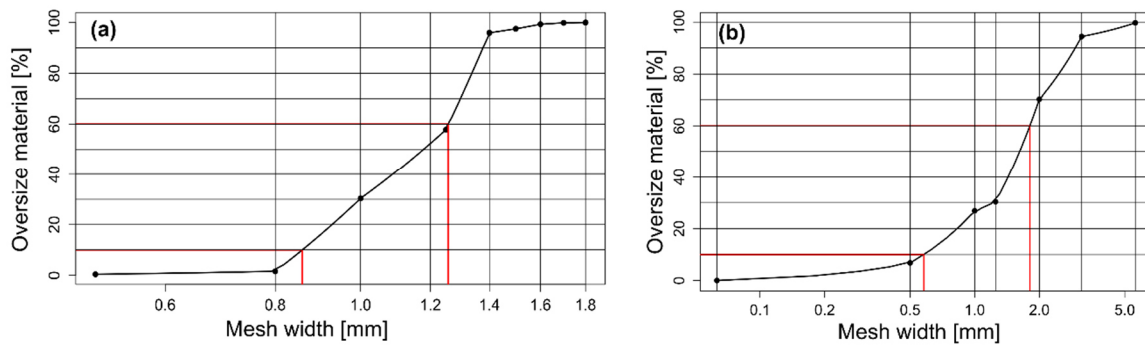

**Figure S1.** Grain size distribution of sand (a) and biochar (b).

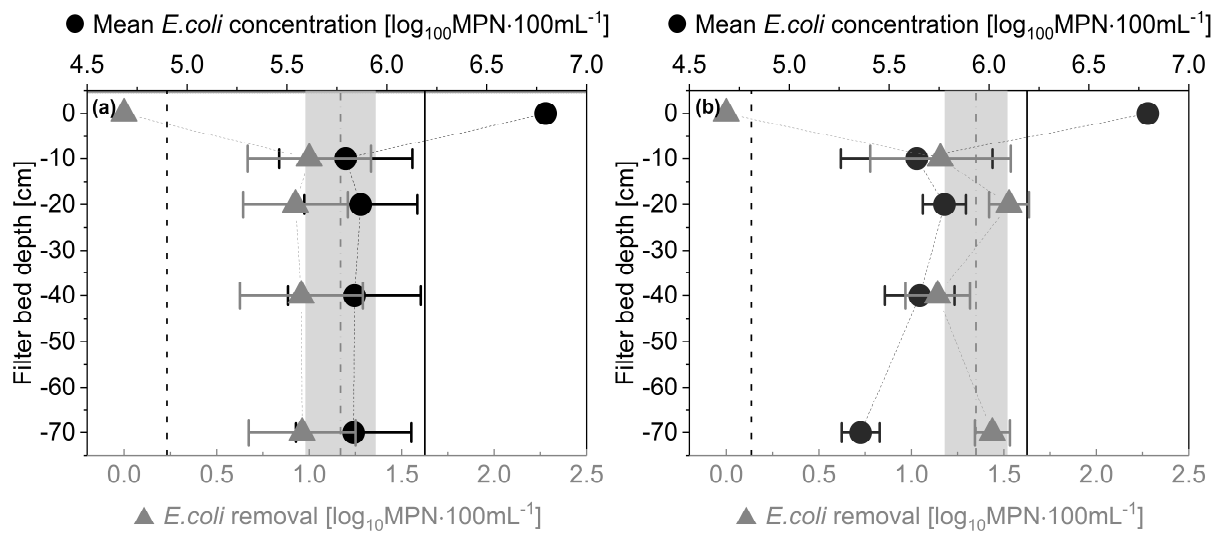

**Figure S2.** Mean *E. coli* concentration and removal over filter depth for sand (a) and biochar (b) filters ( $n = 3$ ). 70 cm marks represent filter effluent and error bars represent standard deviation. Vertical grey dashed-dotted line represents mean *E. coli* removal rate over experimental time ( $n = 23$ ) with 95 % confidence interval (grey area). Solid black line represents mean influent concentration and black dashed line the mean effluent concentration of *E. coli*.

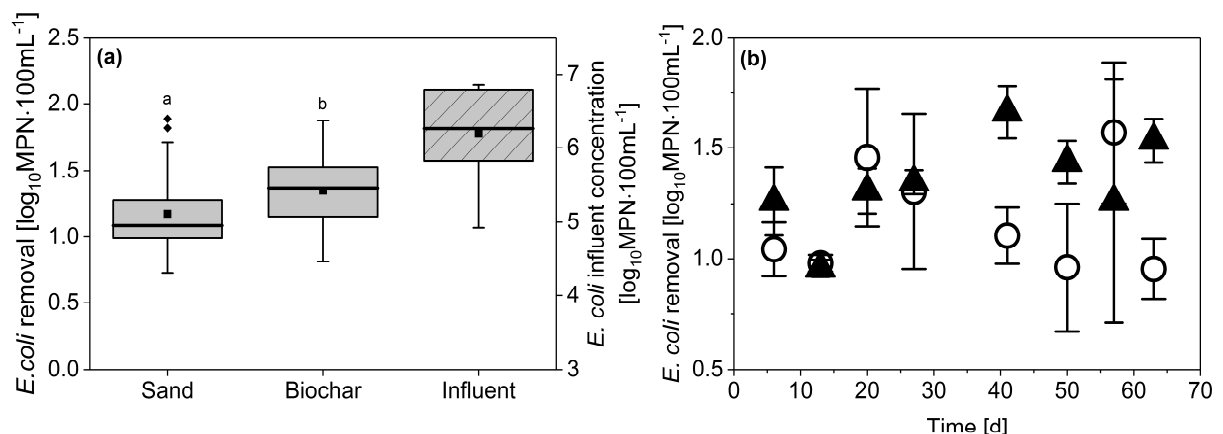

**Figure S3.** Boxplots of mean  $\log_{10}$  removal of *E. coli* through sand and biochar filtration and influent concentration (a). Whiskers represent 1.5 interquartile range and mean values are presented as black squares. Letters indicate a significant difference of the mean ( $p < 0.05$ ) after post-hoc analysis. Mean removal rates of *E. coli* over experimental time for sand (circles) and biochar (black triangle) over experimental time (b). Error bars represent standard deviations.

**Table S1.** Properties of used filter materials. Specific surface area of sand was calculated according to Wichern et al.<sup>1</sup>

| Parameter                         | Unit                           | Sand                     | Biochar                |
|-----------------------------------|--------------------------------|--------------------------|------------------------|
| Max. diameter ( $d_{\max}$ )      | mm                             | 1.8                      | > 5.6                  |
| Effective diameter ( $d_{10}$ )   | mm                             | 0.86                     | 0.58                   |
| $d_{60}$                          | mm                             | 1.26                     | 1.81                   |
| Uniformity coefficient (U)        |                                | 1.47                     | 3.12                   |
| Porosity                          | %                              | 40                       | 59                     |
| HRT <sub>min</sub> *              | h                              | 12                       | 14.8                   |
| HRT <sub>max</sub> **             | h                              | 27.6                     | 30.4                   |
| Bulk density                      | g cm <sup>-3</sup>             | 1.53                     | 0.12                   |
| Specific surface area (BET)       | m <sup>2</sup> g <sup>-1</sup> | < 0.01                   | 500                    |
| Specific surface area (BET)       | m <sup>2</sup> m <sup>-3</sup> | < 1.53 · 10 <sup>4</sup> | 6.13 · 10 <sup>7</sup> |
| Surface area (BET) per filter bed | m <sup>2</sup>                 | < 18                     | 72,000                 |

\*with a minimum headwater level of 30 cm

\*\*with a maximum headwater level of 102 cm

**Table S2.** Chemical characteristics of biochar, which was used in AnBF.

| Parameter | Unit                | Biochar |
|-----------|---------------------|---------|
| Ash       | %                   | 1.4     |
| C         | %                   | 80.0    |
| N         | %                   | 0.5     |
| O         | %                   | 8.1     |
| H         | %                   | 1.3     |
| H/C       | Molar ratio         | 0.19    |
| O/C       | Molar ratio         | 0.08    |
| P         | mg·kg <sup>-1</sup> | 2,686   |
| Al        | mg·kg <sup>-1</sup> | 654     |
| Fe        | mg·kg <sup>-1</sup> | 745     |
| K         |                     | 17,978  |
| Mg        | mg·kg <sup>-1</sup> | 2,350   |
| Na        | mg·kg <sup>-1</sup> | 886     |

**Table S3.** Chemical characteristics of sand, which was used in AnBF.

| <b>Parameter</b>                   | <b>Unit</b>           | <b>Sand</b> |
|------------------------------------|-----------------------|-------------|
| <b>Na<sub>2</sub>O</b>             | % w · w <sup>-1</sup> | 0.09        |
| <b>MgO</b>                         | % w · w <sup>-1</sup> | 0.02        |
| <b>Al<sub>2</sub>O<sub>3</sub></b> | % w · w <sup>-1</sup> | 1.3         |
| <b>SiO<sub>2</sub></b>             | % w · w <sup>-1</sup> | 97.6        |
| <b>K<sub>2</sub>O</b>              | % w · w <sup>-1</sup> | 0.87        |
| <b>CaO</b>                         | % w · w <sup>-1</sup> | 0.02        |
| <b>TiO<sub>2</sub></b>             | % w · w <sup>-1</sup> | 0.024       |
| <b>Fe<sub>2</sub>O<sub>3</sub></b> | % w · w <sup>-1</sup> | 0.067       |
| <b>P<sub>2</sub>O<sub>5</sub></b>  | % w · w <sup>-1</sup> | < 0.01      |

**Table S4.** cLSM settings

| <b>Parameters</b>                            | <b>Settings</b>        |
|----------------------------------------------|------------------------|
| <b>Extinction (Alexa Fluor 488; EPS)</b>     | 488 nm                 |
| <b>Emission (Alexa Fluor 488; EPS)</b>       | 490 – 550 nm           |
| <b>Extinction (SYTO60; total cell count)</b> | 633 nm                 |
| <b>Emission (SYTO60; total cell count)</b>   | 640 – 700 nm           |
| <b>z-stack slice distance</b>                | 2 μm                   |
| <b>Picture area</b>                          | 465 x 465 μm           |
| <b>Scanner speed</b>                         | 200 hz                 |
| <b>Picture resolution</b>                    | 1024 x 1024 pixel      |
| <b>Voxel size</b>                            | 0.455 x 0.455 x 2.0 μm |

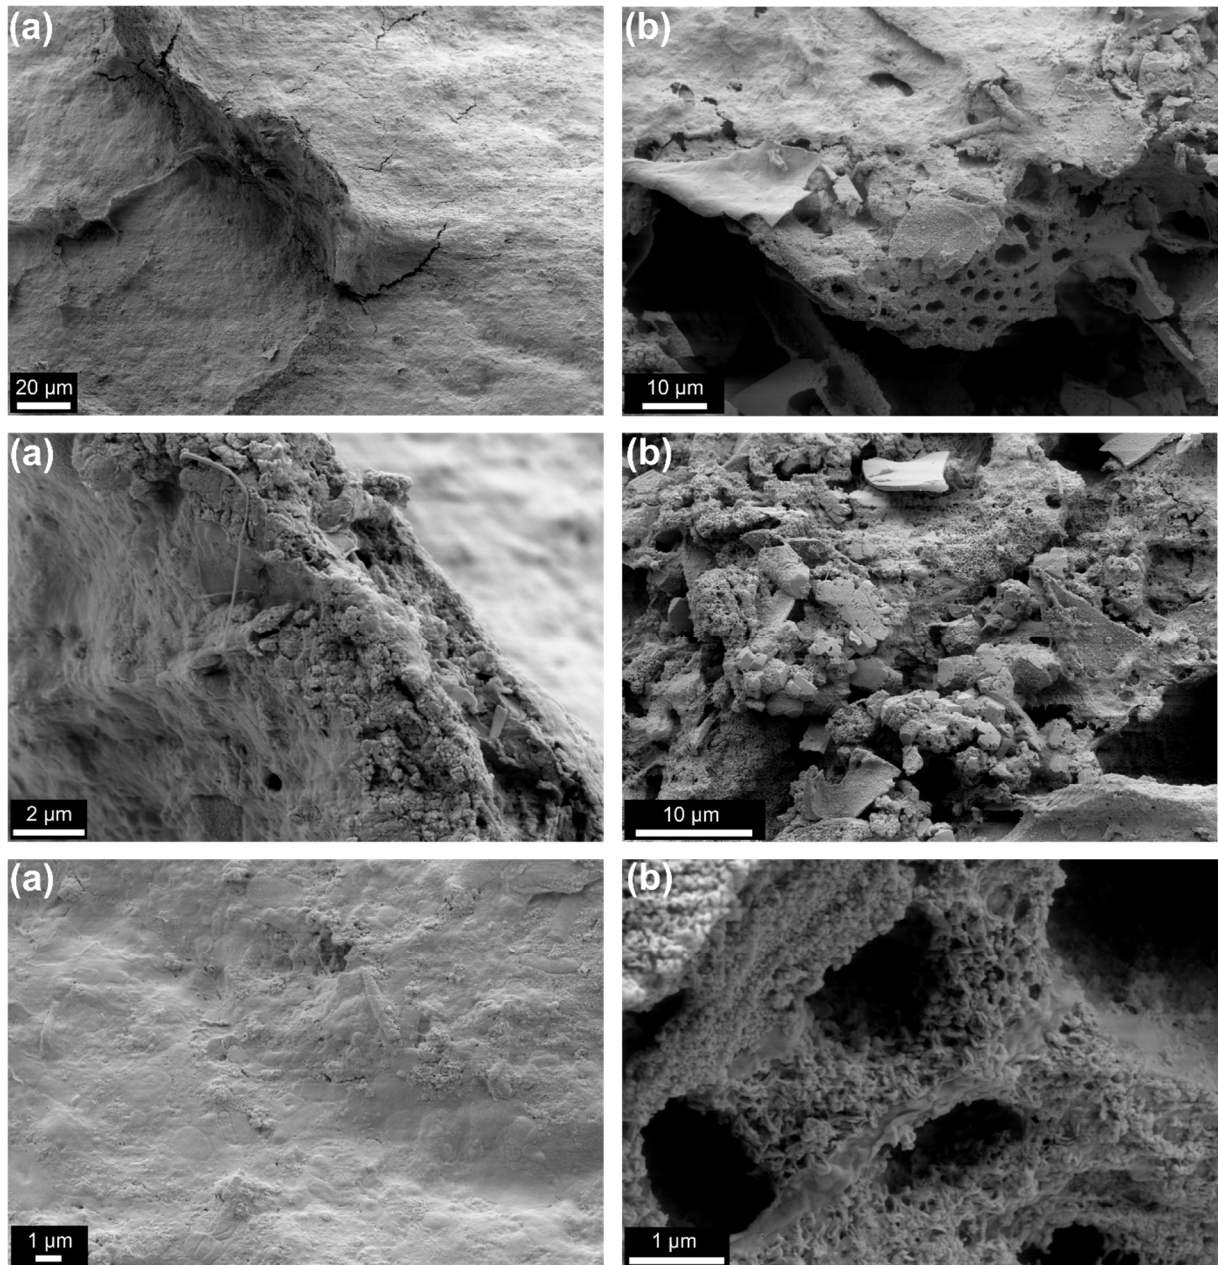

**Figure S4.** Scanning electron images of sand (a) and biochar (b) filter material after 70 days at  $10 \pm 2.5$  cm.

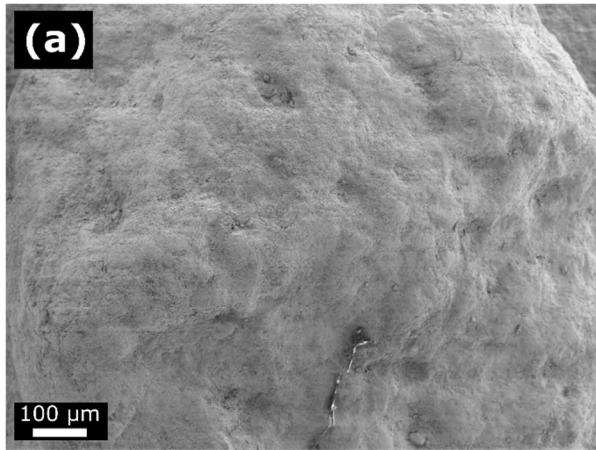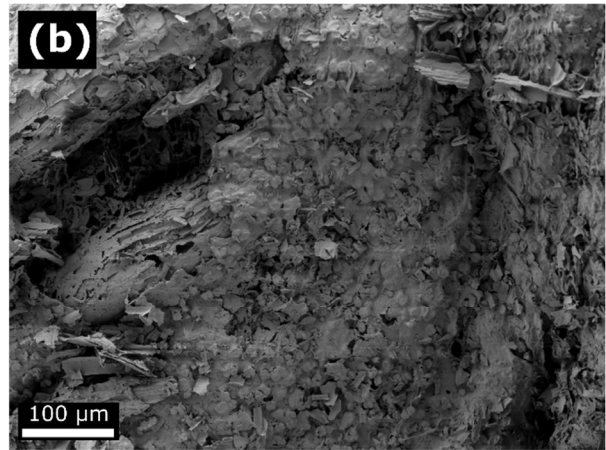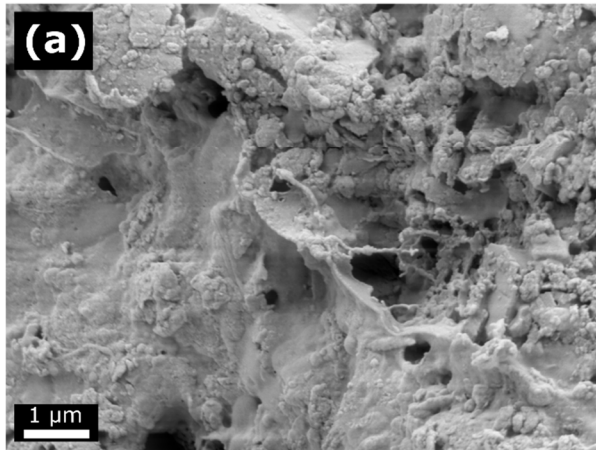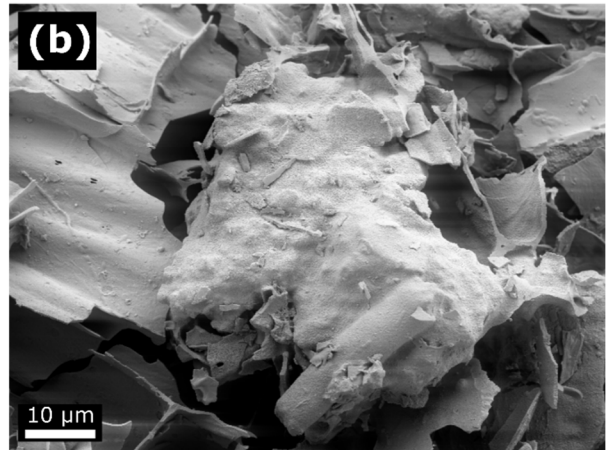

**Figure S5.** Scanning electron images of sand (a) and biochar (b) filter material after 70 days at  $30 \pm 2.5$  cm.

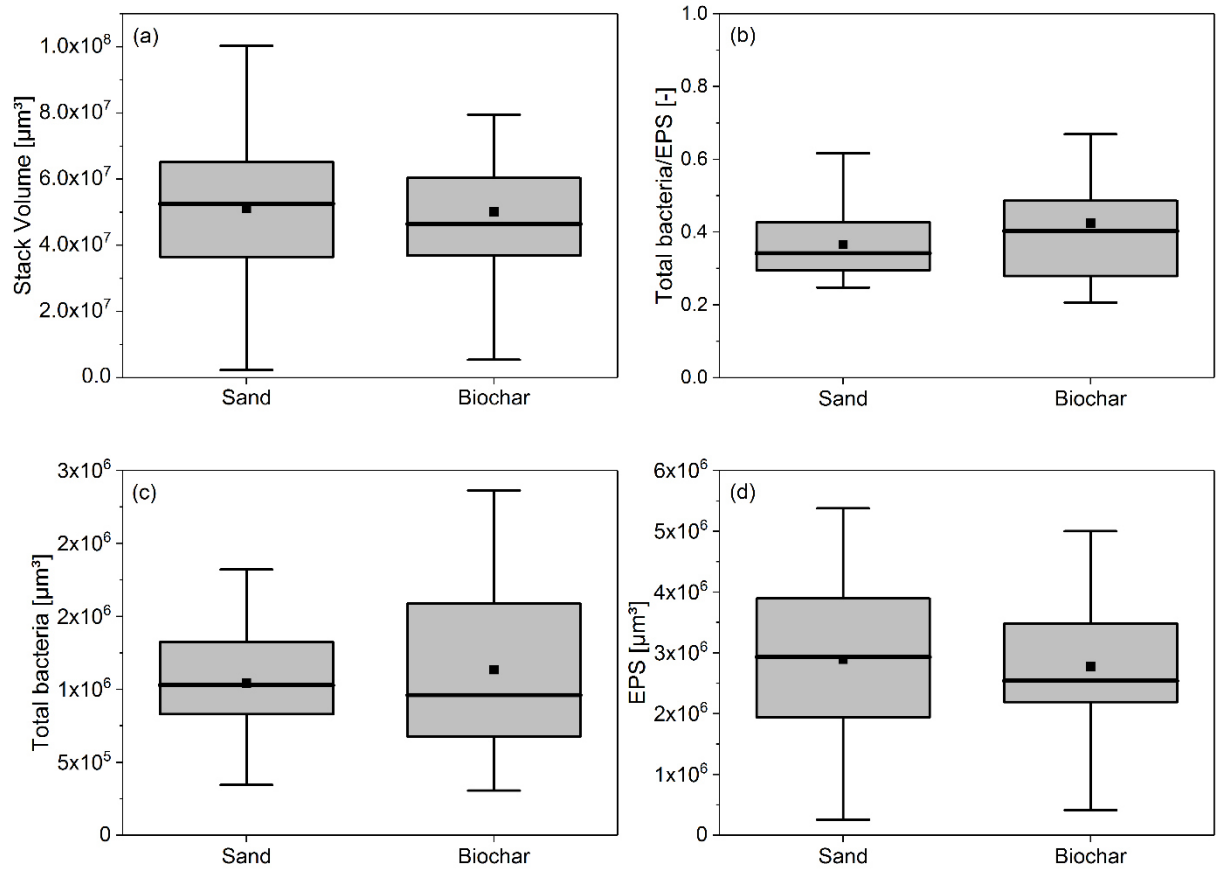

**Figure S6.** Results from cLSM microscope analysis of sand (n = 31) and biochar (n = 25) particles. Average stack volume (a) of scans, total bacteria/EPS ration (b), Volume of total bacteria (c) and Volume of EPS- Glycoprotein (d) .

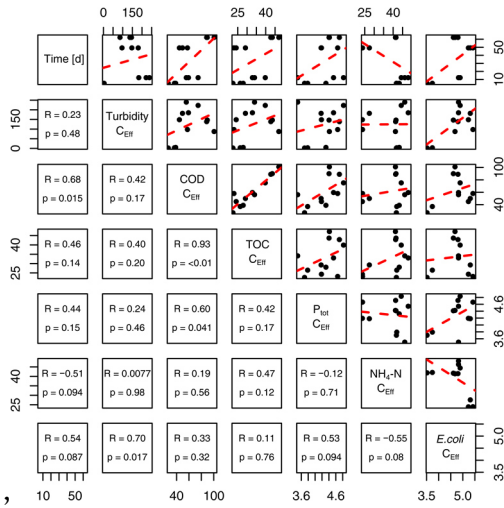

**Figure S7a.** Correlation analysis for effluent concentrations of biochar filters for Turbidity [FNU]; COD, TOC,  $P_{tot}$  and  $NH_4-N$  [ $mg \cdot L^{-1}$ ] and *E. coli* [ $\log_{10}MPN \cdot 100mL^{-1}$ ] over time.

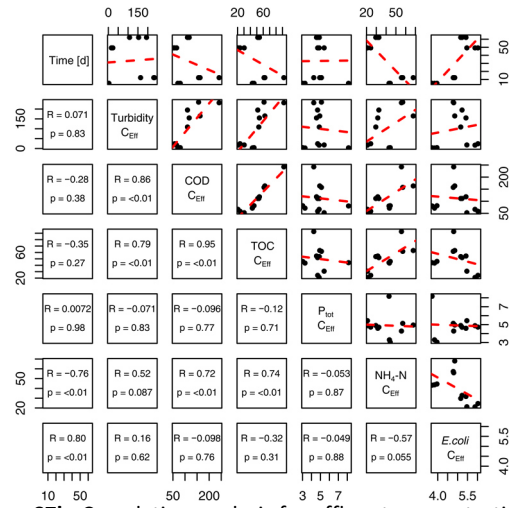

**Figure S7b.** Correlation analysis for effluent concentrations of sand filters for Turbidity [FNU]; COD, TOC,  $P_{tot}$  and  $NH_4-N$  [ $mg \cdot L^{-1}$ ] and *E. coli* [ $\log_{10}MPN \cdot 100mL^{-1}$ ] over time.

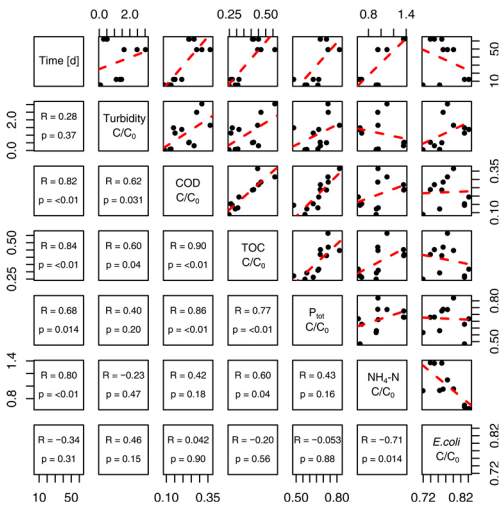

**Figure S7c.** Correlation analysis for normalized ( $C \cdot C_0^{-1}$ ) concentrations of biochar filters, using influent ( $C_0$ ) and effluent concentrations ( $C$ ) of parameters over time.

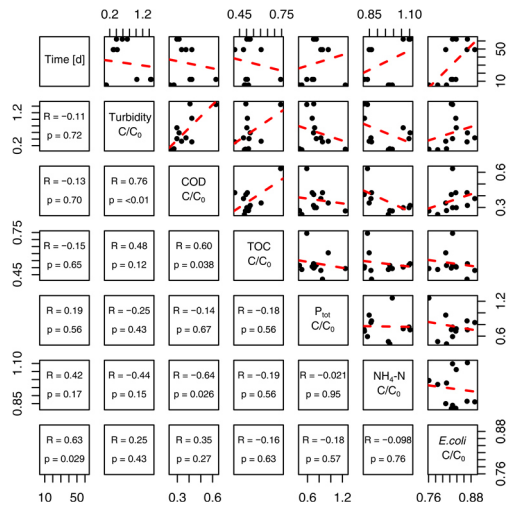

**Figure S7d.** Correlation analysis for normalized ( $C \cdot C_0^{-1}$ ) concentrations of sand filters, using influent ( $C_0$ ) and effluent concentrations ( $C$ ) of parameters over time.

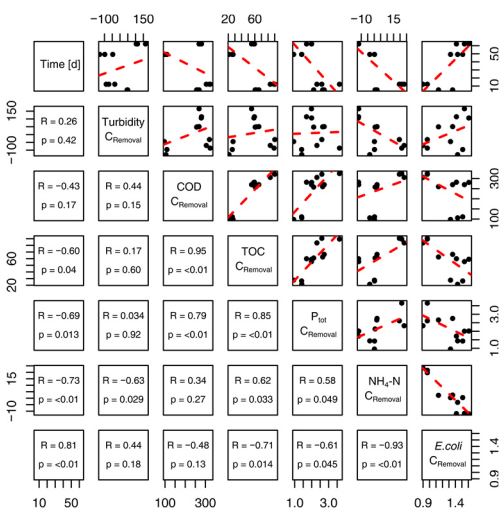

**Figure S7e.** Correlation analysis for removal efficiency of biochar filters for Turbidity [FNU]; COD, TOC,  $P_{tot}$  and  $NH_4-N$  [ $mg \cdot L^{-1}$ ] and *E. coli* [ $\log_{10}MPN \cdot 100mL^{-1}$ ] over time.

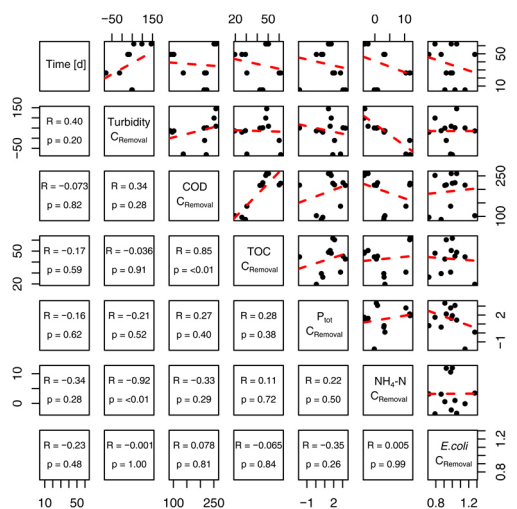

**Figure S7f.** Correlation analysis for removal efficiency of sand filters for Turbidity [FNU]; COD, TOC,  $P_{tot}$  and  $NH_4-N$  [ $mg \cdot L^{-1}$ ] and *E. coli* [ $\log_{10}MPN \cdot 100mL^{-1}$ ] over time.



**Figure S7.** Correlation analysis between selected parameters over experimental time (n=12), for biochar (7a, 7c, 7e) and sand (7b, 7d, 7f) filter, using linear regression. The Pearson correlation coefficient between the individual parameters is represented as "R" with the corresponding *p*-value.

## References

1. Wichern, M., Lindenblatt, C., Lübken, M. & Horn, H. Experimental results and mathematical modelling of an autotrophic and heterotrophic biofilm in a sand filter treating landfill leachate and municipal wastewater. *Water Res.* **42**, 3899–3909 (2008).
